# Supplementary material for: Comparative transcriptome analysis of unripe and ripe banana (cv. Nendran) unraveling genes involved in ripening and other related processes
Source: PubMed Central journal article supplement (PMC8315498; doi:10.1371/journal.pone.0254709), 2021-07-27

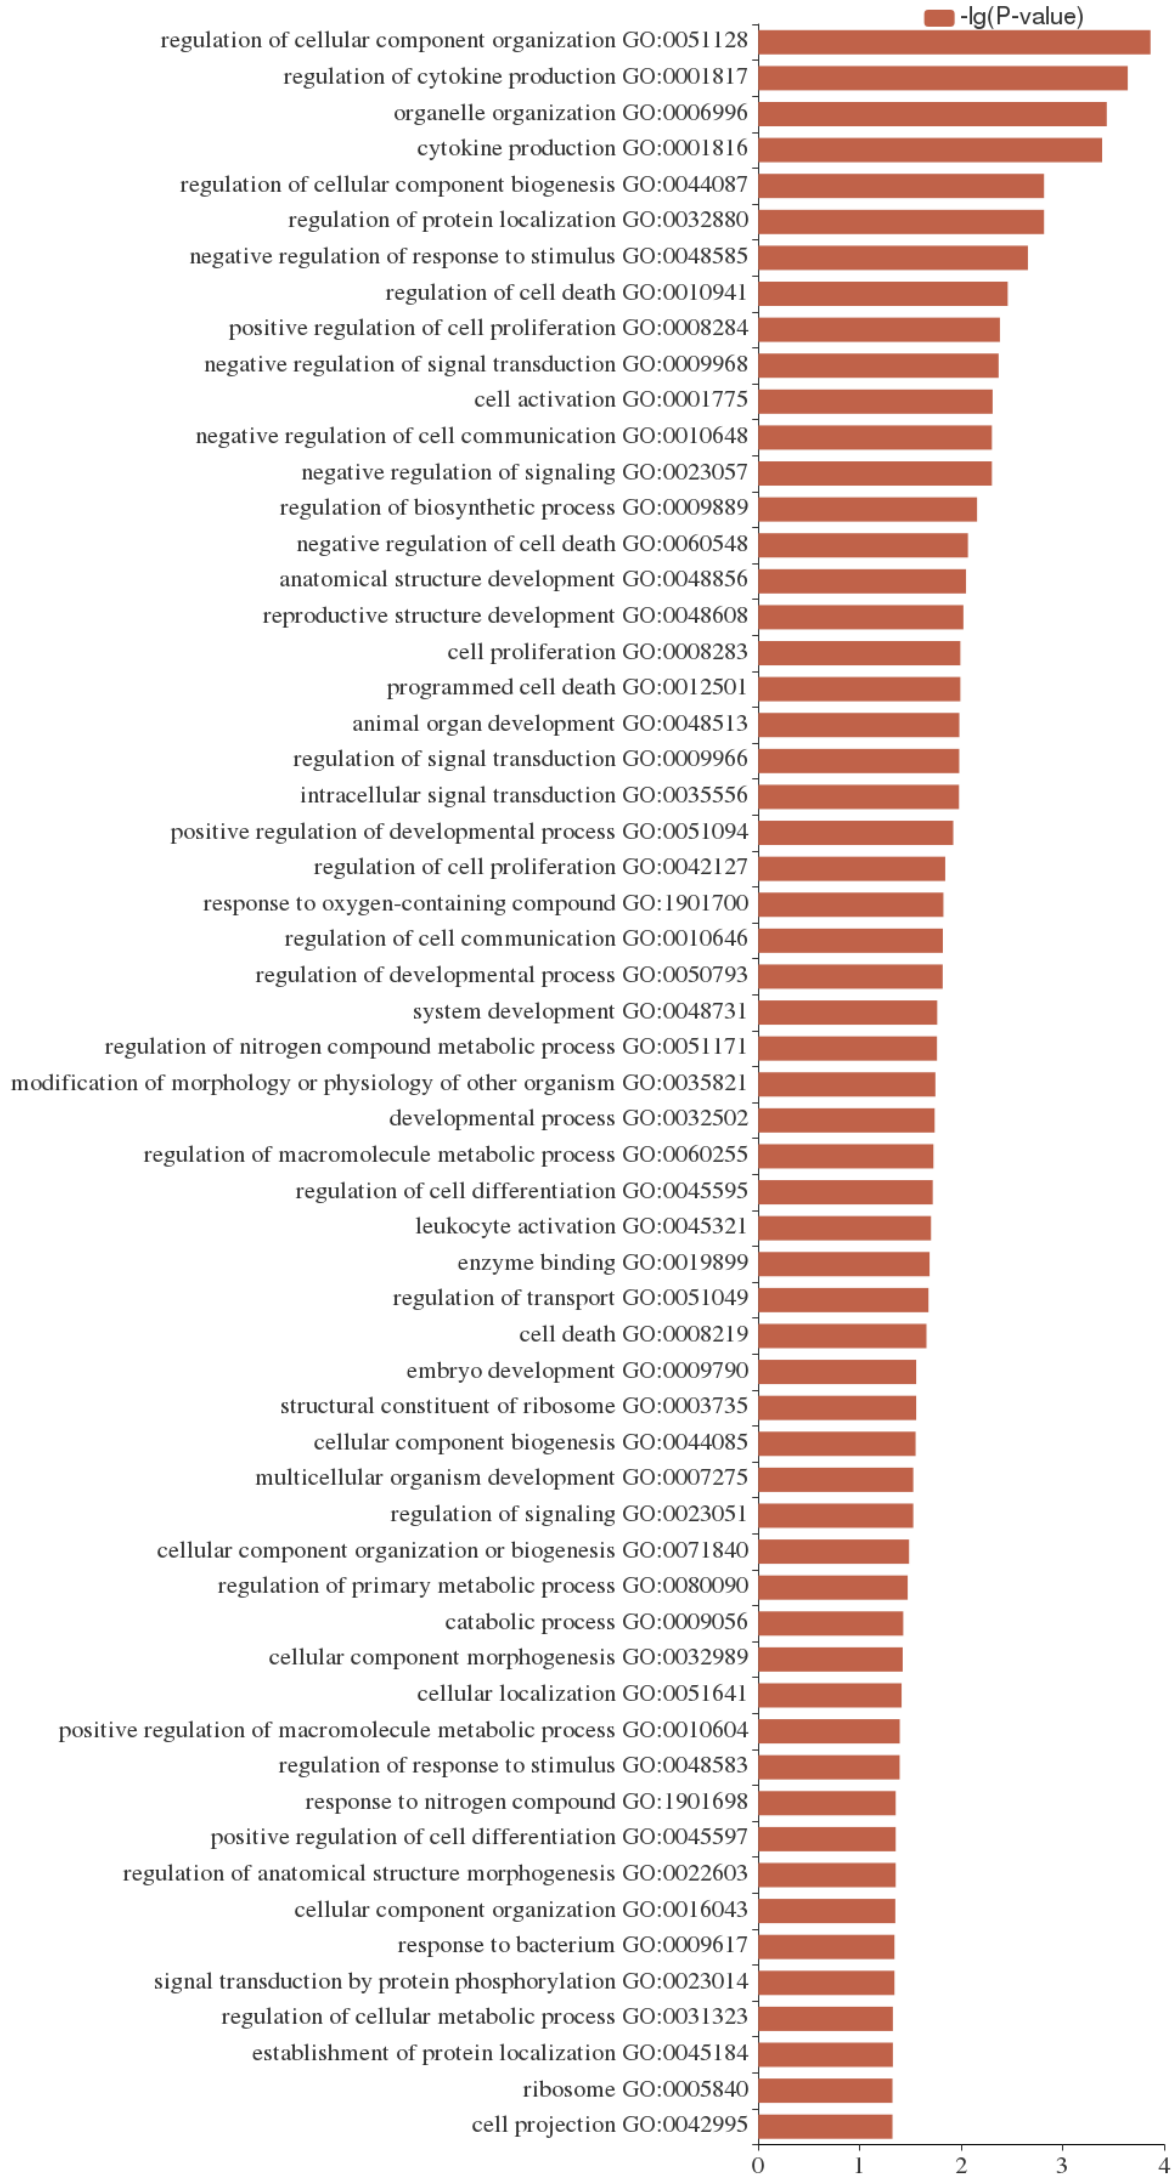

Supplement: pone.0254709.s001.pdf [file pone.0254709.s001.pdf]
